# Supplementary material for: Potassium Channel Antagonists 4-Aminopyridine and the T-Butyl Carbamate Derivative of 4-Aminopyridine Improve Hind Limb Function in Chronically Non-Ambulatory Dogs; A Blinded, Placebo-Controlled Trial
Source: PubMed Central journal article supplement (PMC4281252; doi:10.1371/journal.pone.0116139), 2014-12-31
Supplement: pone.0116139.s003.pdf [file pone.0116139.s003.pdf]

| Dog NO. | Video ID | Week | Treatment | Unsupported |      | Supported |       | OFS | DNI score     |                        |                       |                  |
|---------|----------|------|-----------|-------------|------|-----------|-------|-----|---------------|------------------------|-----------------------|------------------|
|         |          |      |           | SS          | RI   | SS        | RI    |     | Tail function | HL function wo support | HL function w/support | Bladder function |
| 1       | A82      | 1    | placebo   | 0.00        | 0.00 | 6.00      | 0.00  | 3   | U             | U                      | U                     | U                |
| 1       | A62      | 2    | placebo   | 0.00        | 0.00 | 2.00      | 0.00  | 3   | U             | U                      | U                     | U                |
| 1       | A47      | 3    | TBOC lo   | 0.00        | 0.00 | 7.00      | 0.00  | 3   | U             | U                      | U                     | U                |
| 1       | A74      | 4    | TBOC lo   | 0.00        | 0.00 | 17.00     | 0.00  | 4   | U             | U                      | U                     | U                |
| 1       | A32      | 5    | washout   | 0.00        | 0.00 | 15.00     | 0.00  | 5   | U             | U                      | U                     | U                |
| 1       | A87      | 6    | washout   | 0.00        | 0.00 | 4.00      | 0.00  | 5   | U             | U                      | U                     | U                |
| 1       | A21      | 7    | 4AP       | 0.00        | 0.00 | 37.50     | 5.87  | 4.5 | U             | U                      | U                     | U                |
| 1       | A41      | 8    | 4AP       | 0.00        | 0.00 | 37.50     | 7.39  | 4.5 | U             | U                      | U                     | U                |
| 1       | A43      | 9    | placebo   | 0.00        | 0.00 | 4.00      | 0.00  | 4   | U             | U                      | U                     | U                |
| 1       | A27      | 10   | placebo   | 0.00        | 0.00 | 9.50      | 0.00  | 3.5 | U             | U                      | U                     | U                |
| 1       | A93      | 11   | TBOC      | 0.00        | 0.00 | 37.00     | 2.92  | 5   | U             | U                      | I                     | U                |
| 1       | A61      | 12   | TBOC      | 0.00        | 0.00 | 36.00     | 4.17  | 5   | U             | U                      | U                     | U                |
| 2       | B29      | 1    | placebo   | 0.00        | 0.00 | 0.00      | 0.00  | 1.5 | U             | U                      | U                     | U                |
| 2       | B3       | 2    | placebo   | 0.00        | 0.00 | 0.00      | 0.00  | 1.5 | U             | U                      | U                     | U                |
| 2       | B73      | 3    | 4AP       | 0.00        | 0.00 | 0.00      | 0.00  | 1.5 | U             | U                      | U                     | U                |
| 2       | B80      | 4    | 4AP       | 0.00        | 0.00 | 0.00      | 0.00  | 3   | U             | U                      | U                     | U                |
| 2       | B67      | 5    | washout   | 0.00        | 0.00 | 0.00      | 0.00  | 3.5 | U             | U                      | U                     | U                |
| 2       | B22      | 6    | washout   | 0.00        | 0.00 | 0.00      | 0.00  | 1.5 | U             | U                      | U                     | U                |
| 2       | B91      | 7    | TBOC lo   | 0.00        | 0.00 | 0.00      | 0.00  | 1.5 | U             | U                      | U                     | U                |
| 2       | B8080    | 8    | TBOC lo   | 0.00        | 0.00 | 0.00      | 0.00  | 3.5 | U             | U                      | U                     | U                |
| 2       | B24      | 9    | placebo   | 0.00        | 0.00 | 0.00      | 0.00  | 1.5 | U             | U                      | U                     | U                |
| 2       | B27      | 10   | placebo   | 0.00        | 0.00 | 0.00      | 0.00  | 3   | I             | U                      | I                     | U                |
| 2       | B61      | 11   | TBOC      | 0.00        | 0.00 | 37.00     | 0.00  | 4.5 | I             | U                      | I                     | U                |
| 2       | B99      | 12   | TBOC      | 0.00        | 0.00 | 38.50     | 0.00  | 5   | U             | U                      | I                     | U                |
| 3       | C14      | 1    | placebo   | 0.00        | 0.00 | 22.00     | 6.56  | 4   | U             | U                      | U                     | U                |
| 3       | C15      | 2    | placebo   | 0.00        | 0.00 | 0.00      | 0.00  | 3   | U             | U                      | U                     | U                |
| 3       | C68      | 3    | TBOC lo   | 0.00        | 0.00 | 2.00      | 0.00  | 3   | U             | U                      | U                     | U                |
| 3       | C93      | 4    | TBOC lo   | 0.00        | 0.00 | 0.00      | 0.00  | 3   | U             | U                      | U                     | U                |
| 3       | C57      | 5    | washout   | 0.00        | 0.00 | 1.00      | 0.00  | 4   | U             | U                      | U                     | U                |
| 3       | C46      | 6    | washout   | 0.00        | 0.00 | 20.50     | 0.00  | 5   | U             | U                      | U                     | U                |
| 3       | C11      | 7    | 4AP       | 0.00        | 0.00 | 46.50     | 16.41 | 5   | U             | U                      | I                     | U                |
| 3       | C88      | 8    | 4AP       | 0.00        | 0.00 | 20.00     | 10.00 | 5   | U             | U                      | I                     | U                |
| 3       | C13      | 9    | placebo   | 0.00        | 0.00 | 0.50      | 0.00  | 4   | U             | U                      | I                     | U                |
| 3       | C67      | 10   | placebo   | 0.00        | 0.00 | 29.00     | 10.82 | 5   | U             | U                      | U                     | U                |
| 4       | D9       | 1    | placebo   | 0.00        | 0.00 | 0.00      | 0.00  | 1.5 | U             | U                      | U                     | U                |
| 4       | D38      | 2    | placebo   | 0.00        | 0.00 | 0.00      | 0.00  | 1.5 | U             | U                      | U                     | U                |
| 4       | D1       | 3    | TBOC lo   | 0.00        | 0.00 | 0.00      | 0.00  | 3   | U             | U                      | U                     | I                |
| 4       | D95      | 4    | TBOC lo   | 0.00        | 0.00 | 0.00      | 0.00  | 3   | U             | U                      | U                     | U                |
| 4       | D98      | 5    | washout   | 0.00        | 0.00 | 0.00      | 0.00  | 1   | U             | U                      | U                     | D                |
| 4       | D33      | 6    | washout   | 0.00        | 0.00 | 0.00      | 0.00  | 1.5 | U             | U                      | U                     | U                |
| 4       | D72      | 7    | 4AP       | 0.00        | 0.00 | 0.00      | 0.00  | 3.5 | U             | U                      | U                     | I                |
| 4       | D16      | 8    | 4AP       | 0.00        | 0.00 | 0.00      | 0.00  | 3   | I             | U                      | U                     | I                |
| 4       | D17      | 9    | placebo   | 0.00        | 0.00 | 0.00      | 0.00  | 1.5 | U             | U                      | U                     | I                |
| 4       | D54      | 10   | placebo   | 0.00        | 0.00 | 0.00      | 0.00  | 0   | U             | U                      | U                     | I                |
| 5       | F32      | 1    | placebo   | 0.00        | 0.00 | 38.00     | 11.57 | 5.5 | U             | U                      | U                     | U                |
| 5       | F69      | 2    | placebo   | 0.00        | 0.00 | 57.50     | 20.48 | 6   | U             | I                      | I                     | U                |
| 5       | F87      | 3    | 4AP       | 0.00        | 0.00 | 44.00     | 26.39 | 5.5 | U             | U                      | U                     | U                |
| 5       | F81      | 4    | 4AP       | 1.50        | 0.00 | 56.00     | 14.37 | 6.5 | U             | U                      | I                     | U                |
| 5       | F28      | 5    | washout   | 0.00        | 0.00 | 54.00     | 18.18 | 6   | U             | U                      | I                     | U                |
| 5       | F14      | 6    | washout   | 0.00        | 0.00 | 33.00     | 20.74 | 5   | U             | U                      | I                     | U                |
| 5       | F06      | 7    | TBOC lo   | 0.00        | 0.00 | 38.00     | 5.80  | 5   | U             | U                      | I                     | U                |
| 5       | F37      | 8    | TBOC lo   | 0.00        | 0.00 | 61.00     | 12.42 | 6   | U             | U                      | I                     | U                |
| 5       | F52      | 9    | placebo   | 0.00        | 0.00 | 37.00     | 8.80  | 5   | U             | U                      | I                     | U                |
| 5       | F59      | 10   | placebo   | 0.00        | 0.00 | 34.50     | 11.90 | 5.5 | U             | U                      | I                     | U                |
| 5       | F42      | 11   | TBOC      | 0.00        | 0.00 | 52.50     | 17.06 | 6   | U             | U                      | I                     | U                |
| 5       | F09      | 12   | TBOC      | 1.00        | 0.00 | 52.50     | 11.51 | 6   | U             | I                      | I                     | U                |
| 6       | G73      | 1    | placebo   | 0.00        | 0.00 | 19.00     | 3.36  | 4   | U             | U                      | U                     | U                |
| 6       | G35      | 2    | placebo   | 0.00        | 0.00 | 16.00     | 1.64  | 5   | U             | U                      | I                     | U                |

|    |       |    |         |       |       |       |       |     |     |     |     |     |
|----|-------|----|---------|-------|-------|-------|-------|-----|-----|-----|-----|-----|
| 6  | G97   | 3  | TBOC lo | 5.50  | 0.00  | 8.00  | 0.00  | 5   | U   | I   | U   | U   |
| 6  | G77   | 4  | TBOC lo | 0.00  | 0.00  | 6.00  | 0.00  | 5   | U   | I   | I   | U   |
| 6  | G32   | 5  | washout | 7.50  | 3.74  | 25.00 | 8.06  | 5.5 | U   | I   | U   | U   |
| 6  | G18   | 6  | washout | 7.00  | 1.83  | 39.50 | 2.87  | 6   | U   | I   | I   | U   |
| 6  | G37   | 7  | 4AP     | 6.67  | 0.00  | 55.50 | 29.58 | 7   | U   | I   | I   | U   |
| 6  | G40   | 8  | 4AP     | 32.85 | 4.40  | 48.50 | 17.52 | 6   | U   | I   | I   | U   |
| 6  | G45   | 9  | placebo | 12.00 | 3.51  | 20.50 | 8.25  | 5   | U   | I   | I   | U   |
| 6  | G33   | 10 | placebo | 11.50 | 5.22  | 29.00 | 3.10  | 6   | U   | I   | I   | U   |
| 6  | G01   | 11 | TBOC    | 28.50 | 15.69 | 35.00 | 4.46  | 5   | U   | I   | I   | U   |
| 6  | G99   | 12 | TBOC    | 41.00 | 14.15 | 42.50 | 9.83  | 5.5 | U   | I   | I   | U   |
| 7  | H21   | 1  | placebo | 0.00  | 0.00  | 17.00 | 0.00  | 5   | U   | U   | U   | U   |
| 7  | H18   | 2  | placebo | 0.00  | 0.00  | 23.50 | 15.32 | 5   | N/A | N/A | N/A | N/A |
| 7  | H50   | 3  | TBOC lo | 0.00  | 0.00  | 9.00  | 0.00  | 5   | U   | U   | U   | U   |
| 7  | H86   | 4  | TBOC lo | 0.00  | 0.00  | 13.00 | 7.08  | 5   | U   | U   | I   | U   |
| 7  | H29   | 5  | washout | 0.00  | 0.00  | 15.00 | 6.96  | 5   | U   | U   | I   | U   |
| 7  | H62   | 6  | washout | 0.00  | 0.00  | 11.00 | 3.57  | 5   | U   | U   | U   | U   |
| 7  | H40   | 7  | 4AP     | 0.00  | 0.00  | 42.50 | 9.83  | 5   | U   | U   | U   | U   |
| 7  | H45   | 8  | 4AP     | 0.00  | 0.00  | 40.00 | 19.83 | 5   | U   | U   | I   | U   |
| 7  | H42   | 9  | placebo | 0.00  | 0.00  | 13.00 | 1.71  | 5   | U   | U   | U   | U   |
| 7  | H22   | 10 | placebo | 0.00  | 0.00  | 6.50  | 1.89  | 5   | U   | U   | I   | U   |
| 7  | H66   | 11 | TBOC    | 0.00  | 0.00  | 5.50  | 0.00  | 5   | U   | U   | I   | U   |
| 7  | H15   | 12 | TBOC    | 0.00  | 0.00  | 13.00 | 0.00  | 5   | U   | U   | I   | U   |
| 8  | I03   | 1  | placebo | N/A   | N/A   | N/A   | N/A   | 5   | U   | U   | U   | U   |
| 8  | I32   | 2  | placebo | 0.00  | 0.00  | 46.50 | 20.47 | 5   | U   | U   | I   | U   |
| 8  | I01   | 3  | 4AP     | 0.00  | 0.00  | 67.00 | 9.58  | 5   | U   | U   | I   | U   |
| 8  | I73   | 4  | 4AP     | 0.00  | 0.00  | 49.00 | 9.44  | 5   | U   | U   | I   | U   |
| 8  | I30   | 5  | washout | 0.00  | 0.00  | 44.00 | 12.50 | 5   | U   | U   | I   | U   |
| 8  | I23   | 6  | washout | 0.00  | 0.00  | 25.00 | 11.20 | 5   | U   | U   | I   | U   |
| 8  | I91   | 7  | TBOC    | 0.00  | 0.00  | 50.50 | 15.91 | 5   | U   | U   | I   | U   |
| 8  | I87   | 8  | TBOC    | 0.00  | 0.00  | 50.00 | 6.65  | 5   | U   | U   | I   | U   |
| 8  | I06   | 9  | placebo | 0.00  | 0.00  | 45.00 | 15.22 | 5.5 | U   | U   | I   | U   |
| 8  | I49   | 10 | placebo | 0.00  | 0.00  | 45.00 | 20.84 | 5   | U   | U   | I   | U   |
| 9  | J67   | 1  | placebo | 0.00  | 0.00  | 42.00 | 9.80  | 5   | U   | U   | U   | U   |
| 9  | J79   | 2  | placebo | 0.00  | 0.00  | 42.00 | 9.86  | 5   | U   | U   | U   | U   |
| 9  | J71   | 3  | 4AP     | 0.00  | 0.00  | 45.50 | 23.38 | 6   | U   | I   | I   | U   |
| 9  | J32   | 4  | 4AP     | 0.00  | 0.00  | 32.00 | 3.03  | N/A | U   | I   | I   | U   |
| 9  | J69   | 5  | washout | 0.00  | 0.00  | 35.00 | 1.53  | N/A | U   | U   | U   | U   |
| 9  | J19   | 6  | washout | 0.00  | 0.00  | 25.50 | 3.25  | 5   | U   | U   | U   | U   |
| 9  | J16   | 7  | TBOC    | 0.00  | 0.00  | 41.50 | 11.34 | 5   | U   | U   | U   | U   |
| 9  | J84   | 8  | TBOC    | 0.00  | 0.00  | 23.00 | 3.28  | 5   | U   | I   | I   | U   |
| 9  | J62   | 9  | placebo | 0.00  | 0.00  | 37.00 | 11.69 | 5   | U   | U   | U   | U   |
| 9  | J21   | 10 | placebo | 0.00  | 0.00  | 39.00 | 4.38  | 5.5 | U   | U   | U   | U   |
| 10 | K52_1 | 1  | placebo | 0.00  | 0.00  | 41.50 | 12.60 | 5   | U   | U   | U   | U   |
| 10 | K30   | 2  | placebo | 0.00  | 0.00  | 22.00 | 0.00  | 5   | U   | I   | I   | U   |
| 10 | K01   | 3  | TBOC    | 0.00  | 0.00  | 23.00 | 10.74 | 5   | U   | U   | U   | U   |
| 10 | K59   | 4  | TBOC    | 0.00  | 0.00  | 50.00 | 18.67 | 5   | N/A | N/A | N/A | N/A |
| 10 | K56   | 5  | washout | 0.00  | 0.00  | 42.00 | 22.54 | 5   | U   | U   | U   | U   |
| 10 | K38   | 6  | washout | 0.00  | 0.00  | 24.00 | 3.23  | 5   | U   | U   | U   | U   |
| 10 | K19   | 7  | 4AP     | 0.00  | 0.00  | 40.00 | 11.43 | 5   | U   | U   | I   | U   |
| 10 | K33   | 8  | 4AP     | 0.00  | 0.00  | 54.00 | 12.99 | 5   | U   | U   | I   | U   |
| 10 | K52_2 | 9  | placebo | 0.00  | 0.00  | 28.00 | 21.88 | 5   | U   | U   | I   | U   |
| 10 | K09   | 10 | placebo | 0.00  | 0.00  | 22.00 | 8.13  | 5   | U   | U   | I   | U   |
| 11 | L45   | 1  | placebo | 0.00  | 0.00  | 0.00  | 0.00  | 0   | U   | U   | U   | U   |
| 11 | L84   | 2  | placebo | 0.00  | 0.00  | 0.00  | 0.00  | 0   | U   | U   | I   | U   |
| 11 | L13   | 3  | 4AP     | 0.00  | 0.00  | 0.00  | 0.00  | 0   | U   | U   | U   | U   |
| 11 | L91   | 4  | 4AP     | 0.00  | 0.00  | 0.00  | 0.00  | N/A | N/A | N/A | N/A | N/A |
| 12 | M54   | 1  | placebo | 0.00  | 0.00  | 0.00  | 0.00  | 3.5 | U   | U   | U   | U   |
| 12 | M68   | 2  | placebo | 0.00  | 0.00  | 0.00  | 0.00  | 4   | U   | U   | U   | U   |
| 12 | M80   | 3  | TBOC    | 0.00  | 0.00  | 0.00  | 0.00  | 4.5 | I   | U   | U   | U   |
| 12 | M60   | 4  | TBOC    | 0.00  | 0.00  | 0.00  | 0.00  | 4.5 | U   | U   | U   | U   |
| 13 | N67   | 1  | placebo | 0.00  | 0.00  | 0.00  | 0.00  | 2   | U   | U   | U   | U   |
| 13 | N93   | 2  | placebo | 0.00  | 0.00  | 0.00  | 0.00  | 2.5 | U   | U   | U   | U   |
| 13 | N84   | 3  | TBOC    | 0.00  | 0.00  | 0.00  | 0.00  | 3   | U   | U   | U   | U   |
| 13 | N45   | 4  | TBOC    | 0.00  | 0.00  | 0.00  | 0.00  | 2.5 | U   | U   | I   | U   |
| 13 | N13   | 5  | washout | 0.00  | 0.00  | 0.00  | 0.00  | 1   | D   | U   | I   | U   |
| 13 | N91   | 6  | washout | 0.00  | 0.00  | 0.00  | 0.00  | 3   | U   | U   | I   | U   |

|    |       |    |         |       |       |       |       |     |   |   |   |   |
|----|-------|----|---------|-------|-------|-------|-------|-----|---|---|---|---|
| 14 | O32   | 1  | placebo | 1.00  | 0.00  | 30.00 | 16.75 | 4   | U | U | U | U |
| 14 | O92   | 2  | placebo | 0.00  | 0.00  | 24.48 | 8.16  | 4   | U | U | U | U |
| 14 | O68   | 3  | 4AP     | 0.00  | 0.00  | 50.50 | 9.34  | 5   | U | I | I | U |
| 14 | O25   | 4  | 4AP     | 0.00  | 0.00  | 63.00 | 18.41 | 5   | U | I | I | U |
| 14 | O33   | 5  | washout | 0.00  | 0.00  | 19.38 | 4.21  | 4   | U | I | I | U |
| 14 | O53   | 6  | washout | 0.00  | 0.00  | 38.00 | 14.49 | 4   | U | I | I | U |
| 14 | O23   | 7  | TBOC    | 0.00  | 0.00  | 41.00 | 0.00  | 4   | U | I | I | U |
| 14 | O89   | 8  | TBOC    | 0.00  | 0.00  | 20.00 | 3.33  | 4   | U | I | I | U |
| 14 | O85   | 9  | placebo | 0.00  | 0.00  | 71.50 | 37.34 | 5.5 | U | I | I | U |
| 14 | O41   | 10 | placebo | 0.00  | 0.00  | 38.50 | 4.35  | 4   | U | I | I | U |
| 15 | P88   | 1  | placebo | 0.00  | 0.00  | 0.00  | 0.00  | 1   | U | U | U | U |
| 15 | P91   | 2  | placebo | 0.00  | 0.00  | 0.00  | 0.00  | 1   | U | U | U | U |
| 15 | P46   | 3  | 4AP     | 0.00  | 0.00  | 50.00 | 58.67 | 4   | U | U | I | U |
| 15 | P22   | 4  | 4AP     | 0.00  | 0.00  | 39.00 | 28.78 | 4   | U | U | I | U |
| 15 | P50   | 5  | washout | 0.00  | 0.00  | 4.00  | 0.00  | 1   | U | U | I | U |
| 15 | P10   | 6  | washout | 0.00  | 0.00  | 0.00  | 0.00  | 1   | U | U | U | U |
| 15 | P33-1 | 7  | TBOC    | 0.00  | 0.00  | 30.00 | 36.92 | 4   | U | U | U | U |
| 15 | P33-2 | 8  | TBOC    | 0.00  | 0.00  | 0.00  | 0.00  | 1   | U | U | U | U |
| 15 | P95   | 9  | placebo | 0.00  | 0.00  | 10.00 | 0.00  | 3   | U | U | U | U |
| 15 | P01   | 10 | placebo | 0.00  | 0.00  | 34.00 | 5.97  | 3   | U | U | U | U |
| 16 | Q58   | 1  | placebo | 0.00  | 0.00  | 0.00  | 0.00  | N/A | U | U | U | U |
| 16 | Q62   | 2  | placebo | 0.00  | 0.00  | 0.00  | 0.00  | 0   | U | U | U | U |
| 16 | Q20   | 3  | TBOC    | 0.00  | 0.00  | 0.00  | 0.00  | 3   | I | U | U | U |
| 16 | Q97   | 4  | TBOC    | 0.00  | 0.00  | 0.00  | 0.00  | 0   | I | U | U | U |
| 16 | Q79   | 5  | washout | 0.00  | 0.00  | 0.00  | 0.00  | 0   | U | U | U | U |
| 16 | Q84   | 6  | washout | 0.00  | 0.00  | 0.00  | 0.00  | 0   | U | U | U | U |
| 16 | Q44   | 7  | 4AP     | 0.00  | 0.00  | 7.00  | 3.74  | 4   | I | U | U | U |
| 16 | Q28   | 8  | 4AP     | 0.00  | 0.00  | 57.00 | 20.38 | 4   | I | U | U | U |
| 16 | Q04   | 9  | placebo | 0.00  | 0.00  | 0.00  | 0.00  | 3   | U | U | U | U |
| 16 | Q47   | 10 | placebo | 0.00  | 0.00  | 2.00  | 0.00  | 3   | U | U | U | U |
| 17 | R75   | 1  | placebo | 0.00  | 0.00  | 63.00 | 9.82  | 4   | U | U | U | U |
| 17 | R32   | 2  | placebo | 0.00  | 0.00  | 44.00 | 8.33  | 5   | U | U | U | U |
| 17 | R29   | 3  | TBOC    | 48.00 | 8.11  | 53.00 | 20.92 | 6   | U | U | U | U |
| 17 | R67   | 4  | TBOC    | 41.00 | 5.67  | 49.00 | 10.74 | 5   | U | U | U | U |
| 17 | R27   | 5  | washout | 29.00 | 3.10  | 47.00 | 13.61 | 6   | U | U | U | U |
| 17 | R28   | 6  | washout | 51.00 | 21.19 | 51.00 | 15.89 | 6   | U | U | U | U |
| 17 | R39   | 7  | 4AP     | 50.00 | 13.33 | 51.00 | 10.60 | 6   | I | I | U | U |
| 17 | R69   | 8  | 4AP     | 40.00 | 8.57  | 47.00 | 13.61 | 6   | I | I | I | U |
| 17 | R94   | 9  | placebo | 35.00 | 11.85 | 32.00 | 3.03  | 5   | U | U | U | U |
| 17 | R93   | 10 | placebo | 23.08 | 6.25  | 44.00 | 13.89 | 5   | U | U | U | U |
| 18 | S71   | 1  | placebo | 0.00  | 0.00  | 35.00 | 17.78 | 5   | I | I | I | U |
| 18 | S79   | 2  | placebo | 0.00  | 0.00  | 33.00 | 12.03 | 5   | U | U | I | U |
| 18 | S52   | 3  | TBOC    | 0.00  | 0.00  | 57.00 | 17.83 | 5   | U | U | U | U |
| 18 | S61   | 4  | TBOC    | 0.00  | 0.00  | 38.00 | 2.90  | 5   | U | I | U | U |
| 18 | S27   | 5  | washout | 0.00  | 0.00  | 28.00 | 6.25  | 5   | I | I | I | U |
| 18 | S51   | 6  | washout | 0.00  | 0.00  | 50.00 | 18.67 | 5   | I | I | U | U |
| 18 | S80   | 7  | 4AP     | 39.00 | 20.14 | 53.00 | 13.07 | 6   | I | I | I | I |
| 18 | S46   | 8  | 4AP     | 24.00 | 16.13 | 56.00 | 23.08 | 6   | I | I | I | I |
| 18 | S66   | 9  | placebo | 0.00  | 0.00  | 52.00 | 10.53 | 5   | I | I | I | I |
| 18 | S04   | 10 | placebo | 0.00  | 0.00  | 34.00 | 8.96  | 5   | I | I | I | I |
| 19 | T39   | 1  | placebo | 0.00  | 0.00  | 11.00 | 1.82  | 5   | U | U | U | U |
| 19 | T41   | 2  | placebo | 0.00  | 0.00  | 5.50  | 0.00  | 4   | U | U | U | U |
| 19 | T32   | 3  | 4AP     | 0.00  | 0.00  | 50.00 | 18.71 | 5   | U | U | I | U |
| 19 | T84   | 4  | 4AP     | 0.00  | 0.00  | 27.00 | 0.00  | 5.5 | U | U | U | U |
| 19 | T08   | 5  | washout | 0.00  | 0.00  | 36.50 | 7.32  | 5.5 | U | U | U | U |
| 19 | T13   | 6  | washout | 0.00  | 0.00  | 48.50 | 18.80 | 5   | U | U | U | U |
